# Supplementary material for: LiMO2 (M = Ni, Co) thin film cathode materials: a correlation between the valence state of transition metals and the electrochemical properties
Source: Royal Society of Chemistry journal article supplement (doi:10.1039/c3ta14509c), 2013-12-20
Supplement: c3ta14509c.pdf [file c3ta14509c.pdf]

Electronic Supplementary Information:

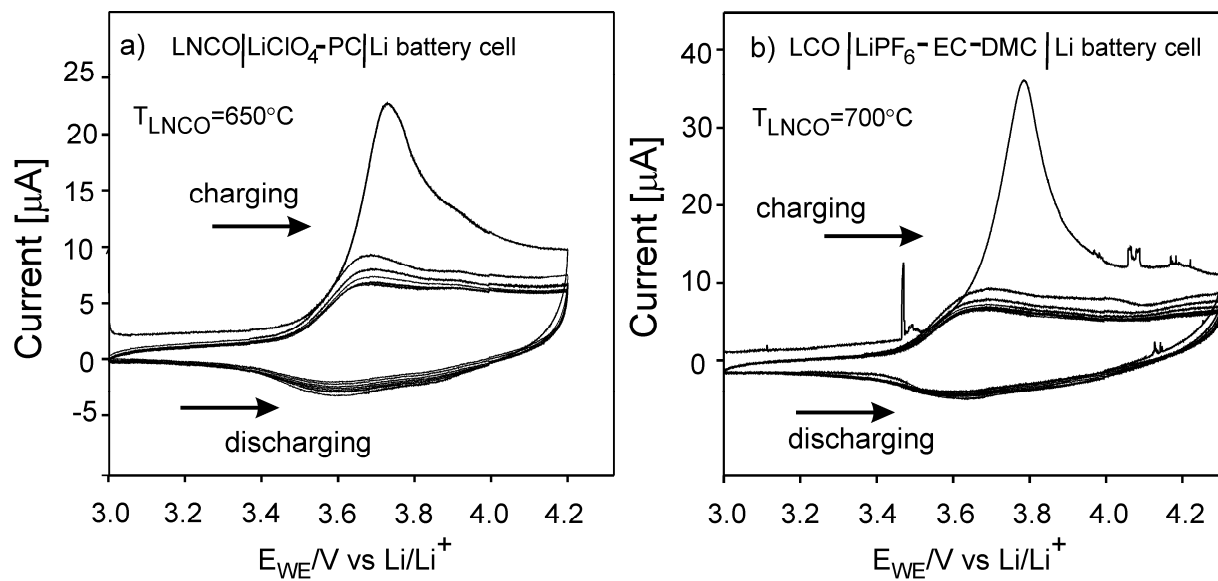

Fig. 1S Cyclic voltammograms of the battery cells with a  $\text{Li}(\text{Ni},\text{Co})\text{O}_2$  film cathode material grown by co-sputtering of the LNCO and  $\text{Li}_2\text{O}$  target materials on a substrate heated at (a)  $T_{\text{dep}}=650^\circ\text{C}$  and (b)  $T_{\text{dep}}=700^\circ\text{C}$ .  $\text{LiClO}_4\text{-PC}$  (a) and  $\text{LiPF}_6\text{-EC-DMC}$  (b) electrolytes were used.
